# Supplementary material for: Bifidobacteria define gut microbiome profiles of golden lion tamarin (Leontopithecus rosalia) and marmoset (Callithrix sp.) metagenomic shotgun pools
Source: PubMed Central journal article supplement (PMC10514281; doi:10.1038/s41598-023-42059-4), 2023-09-21
Supplement: 41598_2023_42059_MOESM8_ESM.pdf [file 41598_2023_42059_MOESM8_ESM.pdf]

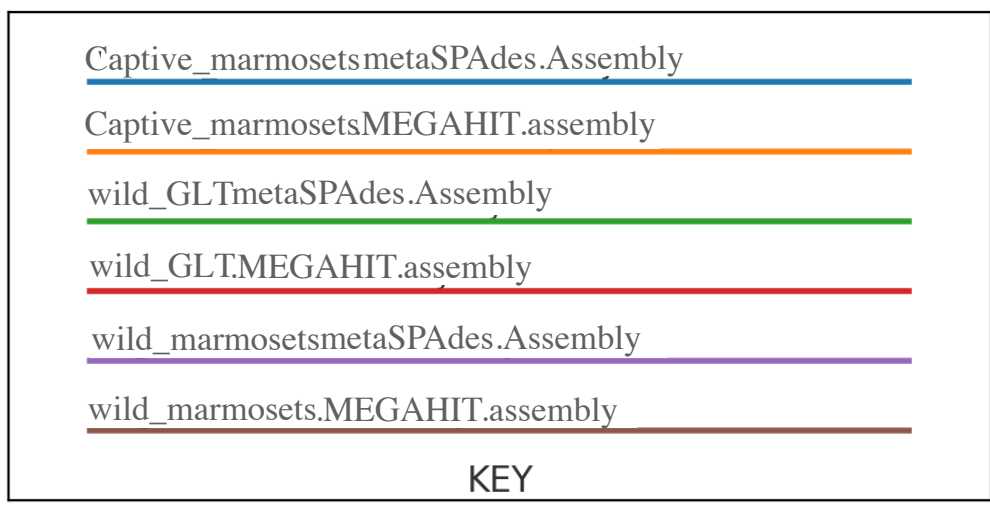

Cumulative Length (in Mbp)

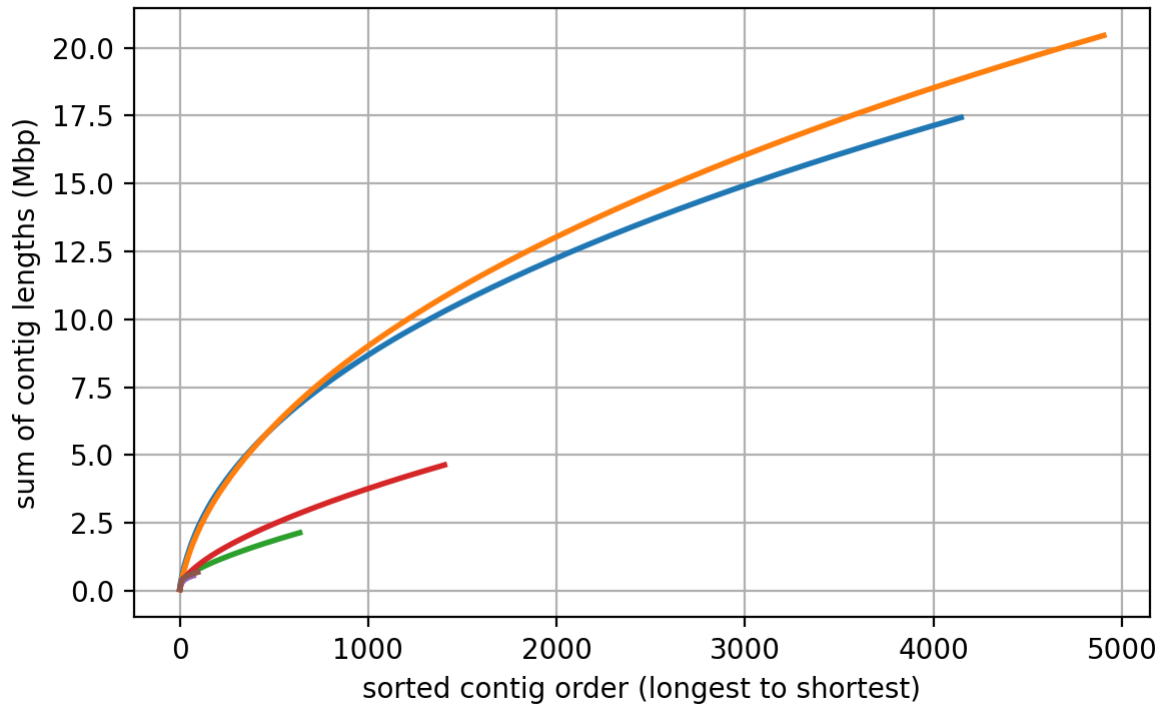

Sorted Contig Lengths (in Mbp)

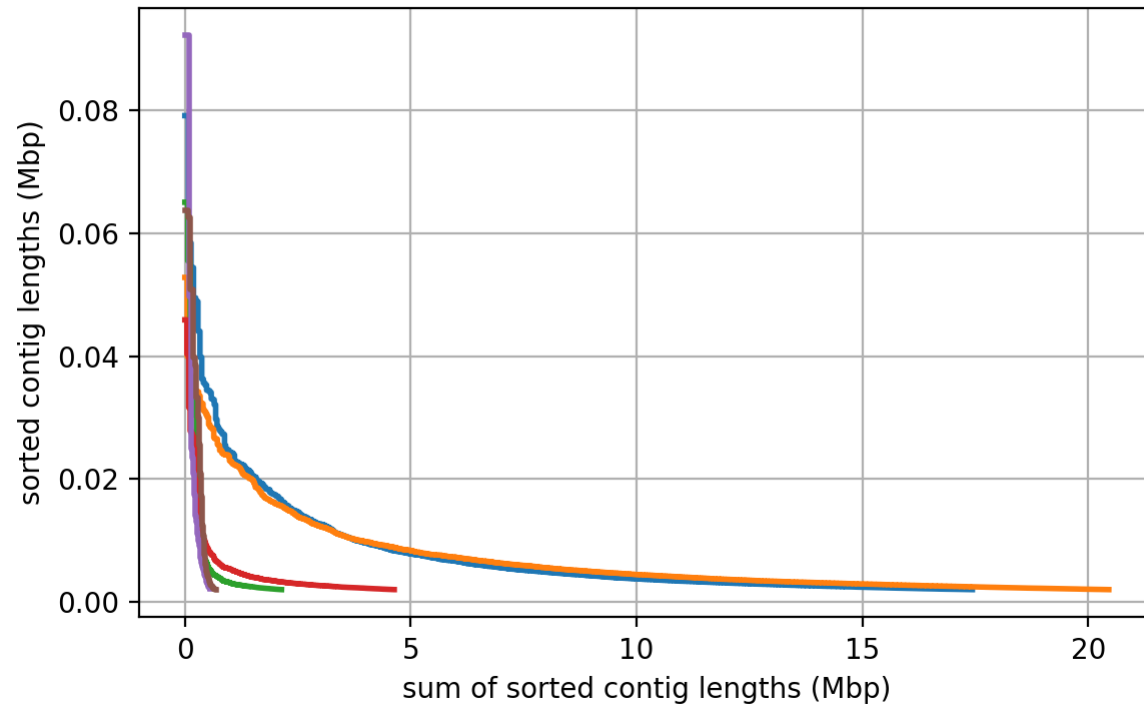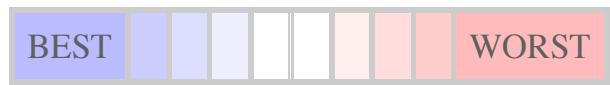

| ASSEMBLY                              | LONGEST CONTIG (bp) | Nx (Lx)     | LENGTH (bp)        | NUM CONTIGS | SUM LENGTH (bp) | Contig Length Histogram (1bp <= len < 10Kbp) | Contig Length Histogram (10Kbp <= len < 100Kbp) | Contig Length Histogram (len >= 100Kbp) |
|---------------------------------------|---------------------|-------------|--------------------|-------------|-----------------|----------------------------------------------|-------------------------------------------------|-----------------------------------------|
| Captive_marmosets.metaSPAdes.Assembly | 79182               | N50: 4421   | >= 10 <sup>6</sup> | 0           | 0               |                                              |                                                 |                                         |
|                                       |                     | L50: (1008) | >= 10 <sup>5</sup> | 0           | 0               |                                              |                                                 |                                         |
|                                       |                     | N75: 2805   | >= 10 <sup>4</sup> | 215         | 3782511         |                                              |                                                 |                                         |
|                                       |                     | L75: (2282) | >= 10 <sup>3</sup> | 4146        | 17435014        |                                              |                                                 |                                         |
|                                       |                     | N90: 2263   | >= 500             | 4146        | 17435014        |                                              |                                                 |                                         |
|                                       |                     | L90: (3325) | >= 1               | 4146        | 17435014        |                                              |                                                 |                                         |
| Captive_marmosets.MEGAHIT.assembly    | 52839               | N50: 4374   | >= 10 <sup>6</sup> | 0           | 0               |                                              |                                                 |                                         |
|                                       |                     | L50: (1262) | >= 10 <sup>5</sup> | 0           | 0               |                                              |                                                 |                                         |
|                                       |                     | N75: 2856   | >= 10 <sup>4</sup> | 238         | 3888728         |                                              |                                                 |                                         |
|                                       |                     | L75: (2745) | >= 10 <sup>3</sup> | 4903        | 20455038        |                                              |                                                 |                                         |
|                                       |                     | N90: 2293   | >= 500             | 4903        | 20455038        |                                              |                                                 |                                         |
|                                       |                     | L90: (3948) | >= 1               | 4903        | 20455038        |                                              |                                                 |                                         |
| wild_GLT.metaSPAdes.Assembly          | 65079               | N50: 2932   | >= 10 <sup>6</sup> | 0           | 0               |                                              |                                                 |                                         |
|                                       |                     | L50: (183)  | >= 10 <sup>5</sup> | 0           | 0               |                                              |                                                 |                                         |
|                                       |                     | N75: 2340   | >= 10 <sup>4</sup> | 14          | 356800          |                                              |                                                 |                                         |
|                                       |                     | L75: (389)  | >= 10 <sup>3</sup> | 637         | 2140135         |                                              |                                                 |                                         |
|                                       |                     | N90: 2119   | >= 500             | 637         | 2140135         |                                              |                                                 |                                         |
|                                       |                     | L90: (533)  | >= 1               | 637         | 2140135         |                                              |                                                 |                                         |
| wild_GLT.MEGAHIT.assembly             | 45927               | N50: 3096   | >= 10 <sup>6</sup> | 0           | 0               |                                              |                                                 |                                         |
|                                       |                     | L50: (451)  | >= 10 <sup>5</sup> | 0           | 0               |                                              |                                                 |                                         |
|                                       |                     | N75: 2413   | >= 10 <sup>4</sup> | 23          | 436313          |                                              |                                                 |                                         |
|                                       |                     | L75: (878)  | >= 10 <sup>3</sup> | 1405        | 4635601         |                                              |                                                 |                                         |
|                                       |                     | N90: 2159   | >= 500             | 1405        | 4635601         |                                              |                                                 |                                         |
|                                       |                     | L90: (1182) | >= 1               | 1405        | 4635601         |                                              |                                                 |                                         |
| wild_marmosets.metaSPAdes.Assembly    | 92239               | N50: 12354  | >= 10 <sup>6</sup> | 0           | 0               |                                              |                                                 |                                         |
|                                       |                     | L50: (10)   | >= 10 <sup>5</sup> | 0           | 0               |                                              |                                                 |                                         |
|                                       |                     | N75: 5248   | >= 10 <sup>4</sup> | 12          | 303063          |                                              |                                                 |                                         |
|                                       |                     | L75: (29)   | >= 10 <sup>3</sup> | 72          | 555489          |                                              |                                                 |                                         |
|                                       |                     | N90: 3018   | >= 500             | 72          | 555489          |                                              |                                                 |                                         |
|                                       |                     | L90: (50)   | >= 1               | 72          | 555489          |                                              |                                                 |                                         |
| wild_marmosets.MEGAHIT.assembly       | 63796               | N50: 25568  | >= 10 <sup>6</sup> | 0           | 0               |                                              |                                                 |                                         |
|                                       |                     | L50: (8)    | >= 10 <sup>5</sup> | 0           | 0               |                                              |                                                 |                                         |
|                                       |                     | N75: 4062   | >= 10 <sup>4</sup> | 13          | 416608          |                                              |                                                 |                                         |
|                                       |                     | L75: (31)   | >= 10 <sup>3</sup> | 96          | 685050          |                                              |                                                 |                                         |
|                                       |                     | N90: 2344   | >= 500             | 96          | 685050          |                                              |                                                 |                                         |
|                                       |                     | L90: (65)   | >= 1               | 96          | 685050          |                                              |                                                 |                                         |
