# Supplementary material for: Bifidobacteria define gut microbiome profiles of golden lion tamarin (Leontopithecus rosalia) and marmoset (Callithrix sp.) metagenomic shotgun pools
Source: PubMed Central journal article supplement (PMC10514281; doi:10.1038/s41598-023-42059-4), 2023-09-21
Supplement: 41598_2023_42059_MOESM9_ESM.pdf [file 41598_2023_42059_MOESM9_ESM.pdf]

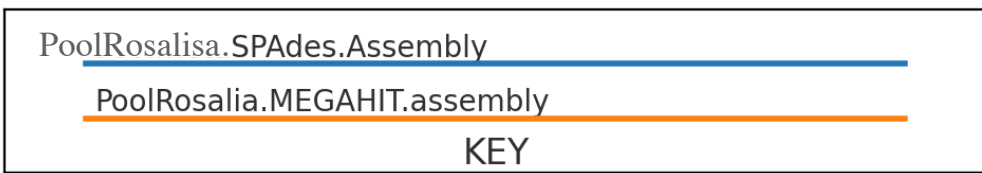

Cumulative Length (in Mbp)

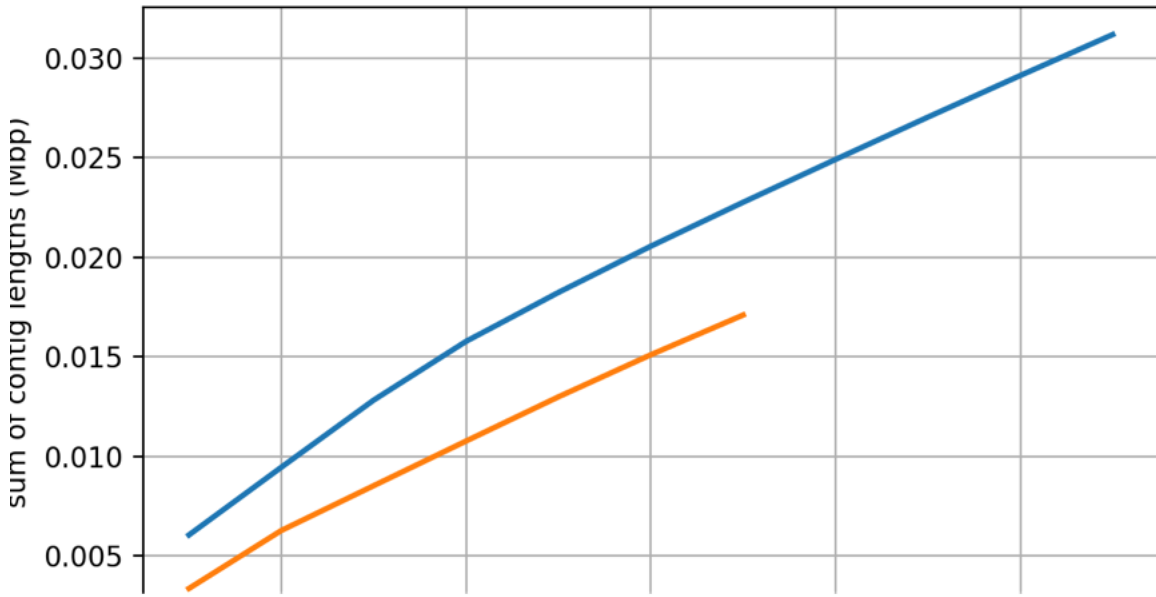

Sorted Contig Lengths (in Mbp)

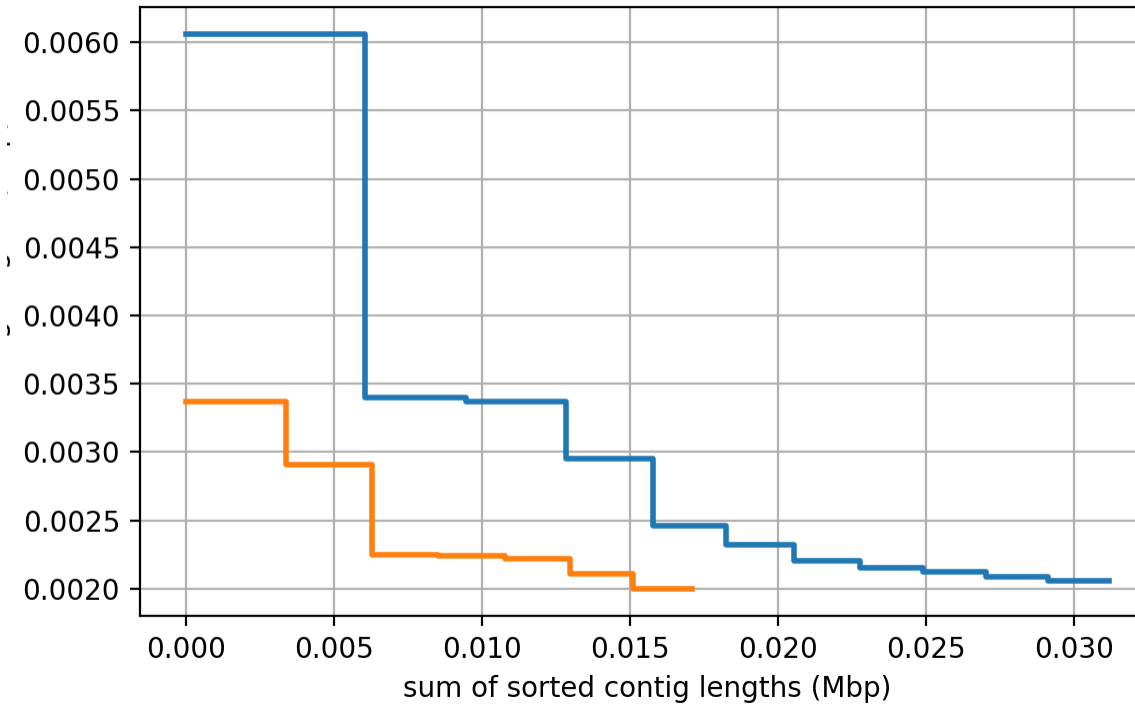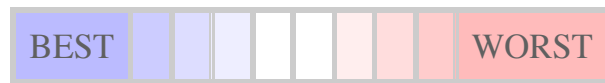

| ASSEMBLY                         | LONGEST CONTIG (bp) | Nx (Lx)   | LENGTH (bp)        | NUM CONTIGS | SUM LENGTH (bp) | Contig Length Histogram (1bp <= len < 10Kbp) | Contig Length Histogram (10Kbp <= len < 100Kbp) | Contig Length Histogram (len >= 100Kbp) |
|----------------------------------|---------------------|-----------|--------------------|-------------|-----------------|----------------------------------------------|-------------------------------------------------|-----------------------------------------|
| PoolRosalisa.metaSPAdes.Assembly | 6058                | N50: 2949 | >= 10 <sup>6</sup> | 0           | 0               |                                              |                                                 |                                         |
|                                  |                     | L50: (4)  | >= 10 <sup>5</sup> | 0           | 0               |                                              |                                                 |                                         |
|                                  |                     | N75: 2149 | >= 10 <sup>4</sup> | 0           | 0               |                                              |                                                 |                                         |
|                                  |                     | L75: (8)  | >= 10 <sup>3</sup> | 11          | 31180           |                                              |                                                 |                                         |
|                                  |                     | N90: 2088 | >= 500             | 11          | 31180           |                                              |                                                 |                                         |
|                                  |                     | L90: (10) | >= 1               | 11          | 31180           |                                              |                                                 |                                         |
| PoolRosalia.MEGAHIT.assembly     | 3371                | N50: 2241 | >= 10 <sup>6</sup> | 0           | 0               |                                              |                                                 |                                         |
|                                  |                     | L50: (4)  | >= 10 <sup>5</sup> | 0           | 0               |                                              |                                                 |                                         |
|                                  |                     | N75: 2219 | >= 10 <sup>4</sup> | 0           | 0               |                                              |                                                 |                                         |
|                                  |                     | L75: (5)  | >= 10 <sup>3</sup> | 7           | 17102           |                                              |                                                 |                                         |
|                                  |                     | N90: 2000 | >= 500             | 7           | 17102           |                                              |                                                 |                                         |
|                                  |                     | L90: (7)  | >= 1               | 7           | 17102           |                                              |                                                 |                                         |
